# Supplementary material
Source: ML conference proceedings conference paper supplement (https://openreview.net/forum?id=fgW3IZzxmE)

MBV2-w0.35

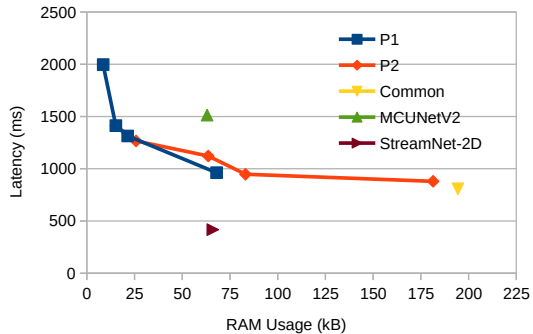

MN2-vww5

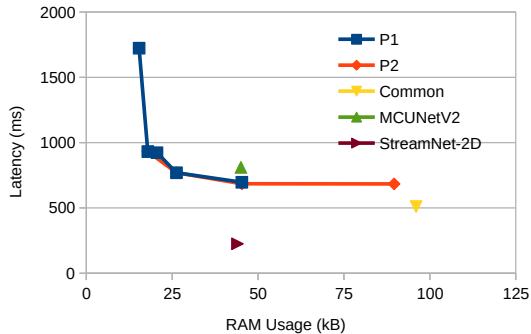

MN2-320K

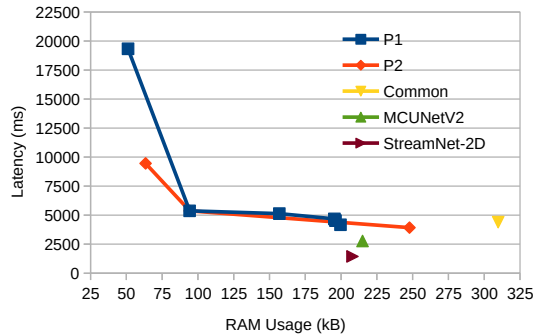

Supplement: supplementary_material [file RAM-latency trade-off.pdf › RAM-latency trade-off.pdf]
